# Supplementary material
Source: Springer Nature journal article supplement (https://www.springermedizin.de/resource/supplementary/13098_2011_132_MOESM4_ESM.pdf/9670574)

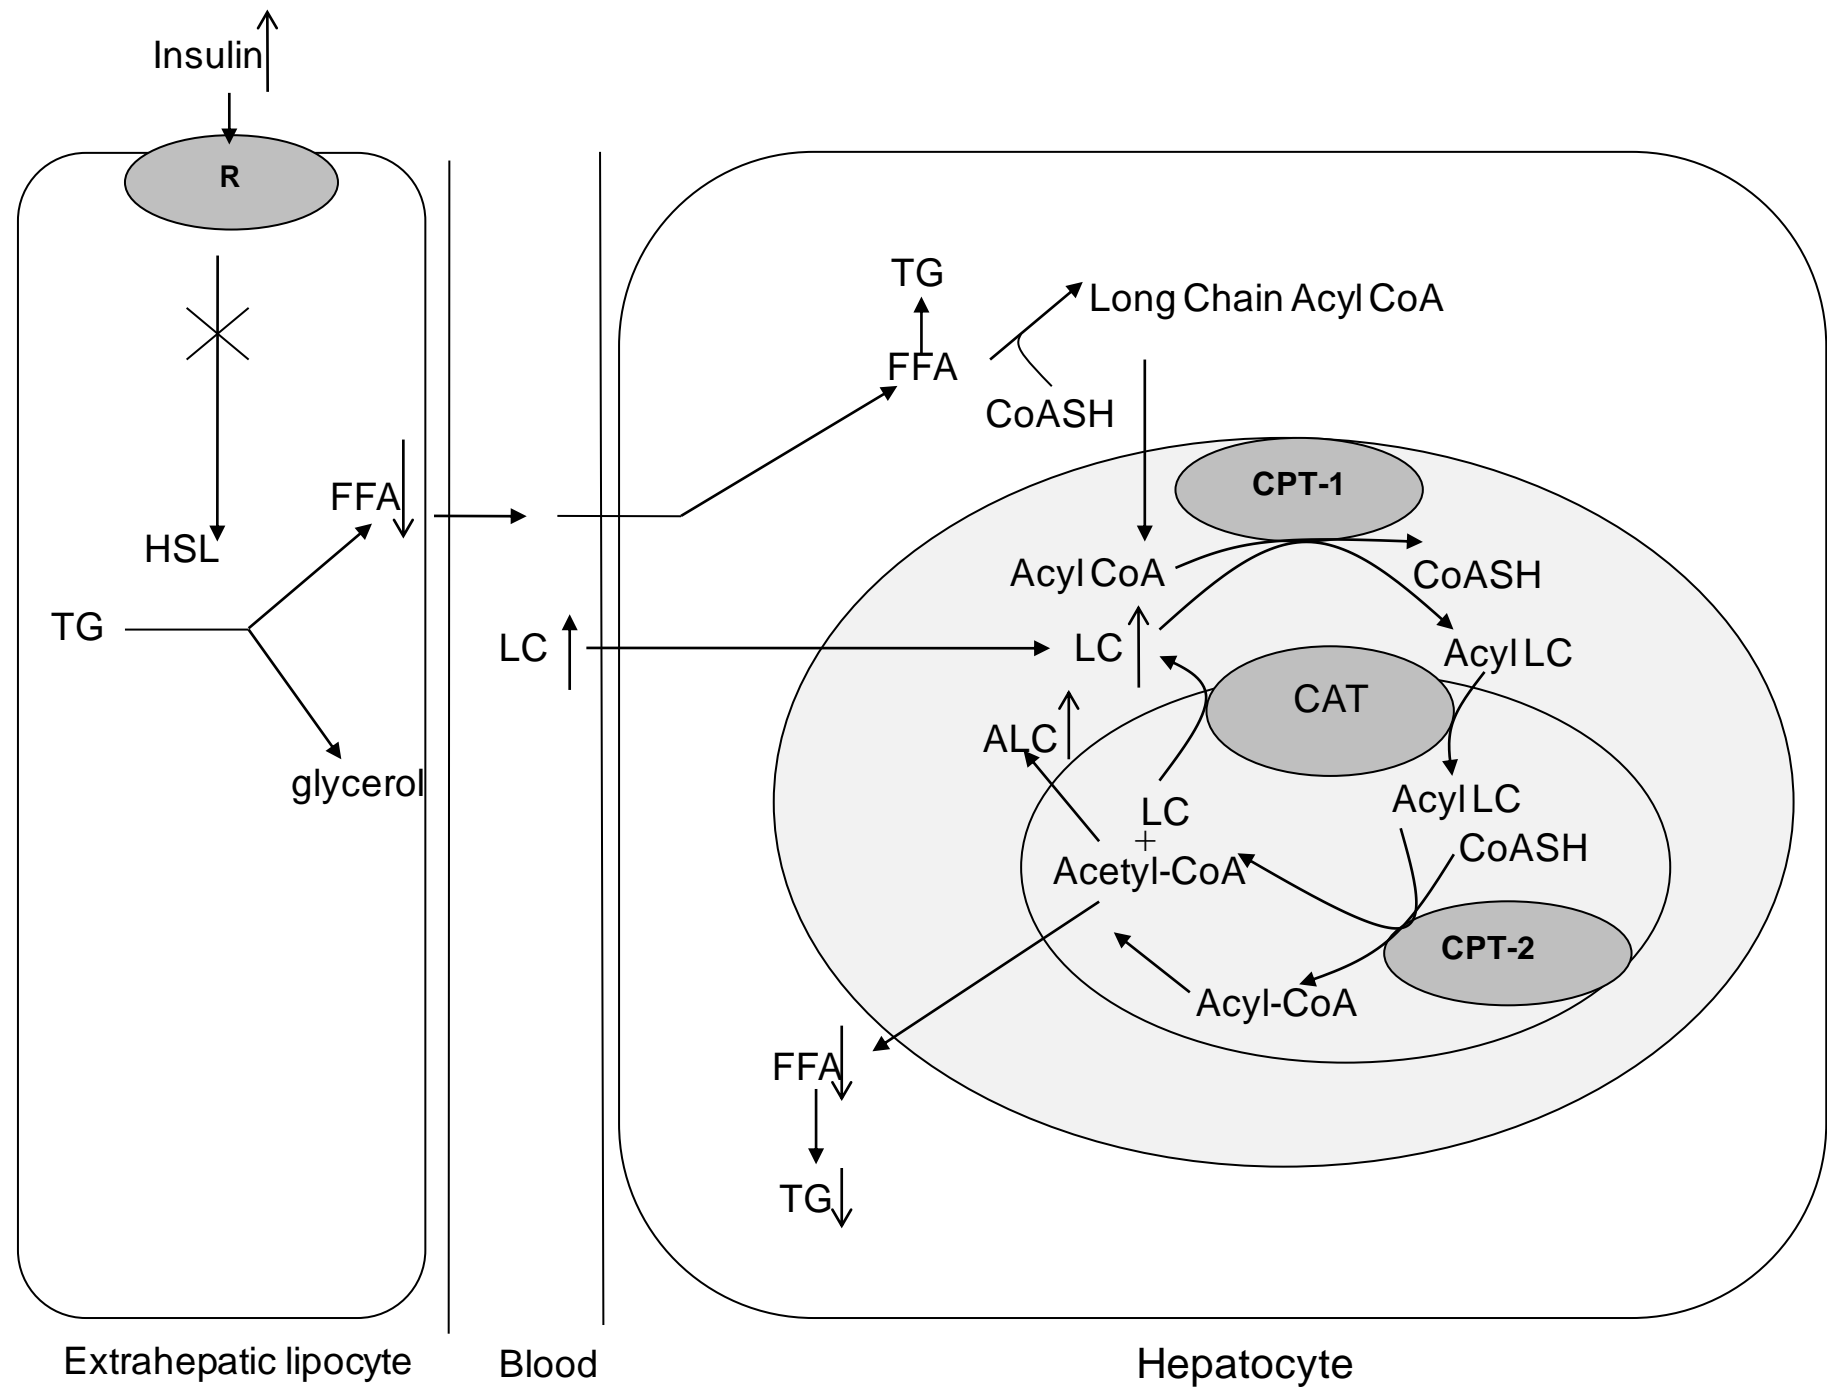

Supplement: MOESM4 [file 9670574]
